#### EP.FRI.32

### Emotional Resilience and Bariatric Surgical Teams: a Priority in the Pandemic

Yitka Graham<sup>1,2</sup>, Kamal Mahawar<sup>1</sup>, Manel Riera<sup>3</sup>, Islam Omar<sup>1</sup>,  
Aparna Bhasker<sup>4</sup>, Michael Wilson<sup>5</sup>

<sup>1</sup>Department of General Surgery, Sunderland Royal Hospital, South Tyneside and Sunderland NHS Foundation Trust, Kayll Road, Sunderland, UK, <sup>2</sup>Helen McArdle Nursing and Care Research Institute, Faculty of Health Sciences and Wellbeing, University of Sunderland, Sunderland, UK, <sup>3</sup>Department of General Surgery, Royal Shrewsbury Hospital, The Shrewsbury and Telford Hospitals NHS Trust, Mytton Oak Road, Shrewsbury, UK, <sup>4</sup>Apollo and Gleneagles Global Hospitals, Mumbai, India, <sup>5</sup>Department of General Surgery, Forth Valley Royal Hospital, NHS Forth Valley, Stirling Road, Larbert, UK

The infection control measures implemented as a result of COVID-19 led to a postponement of bariatric surgical procedures across many countries worldwide. Many bariatric surgical teams were in essence left without a profession, with many redeployed to other areas of clinical care and were not able to provide the levels of patient support given before COVID-19. As the pandemic continues, some restrictions have been lifted, with staff adjusting to new ways of working, incorporating challenging working conditions and dealing with continuing levels of

stress. This article explores the concept of emotional labour, defined as 'inducing or suppressing feelings in order to perform one's work', and its application to multidisciplinary teams working within bariatric surgery, to offer insight into the mental health issues that may be affecting healthcare professionals working in this discipline.
